# Supplementary material for: Catalytic hydrodeoxygenation of palmitic acid over a bifunctional Co-doped MoO2/CNTs catalyst: an insight into the promoting effect of cobalt
Source: Royal Society of Chemistry journal article supplement (doi:10.1039/c5cy01575h), 2015-11-26
Supplement: c5cy01575h1.pdf [file c5cy01575h1.pdf]

Electronic Supplementary Information

**Catalytic Hydrodeoxygenation of Palmitic Acid over Bifunctional Co-doped  
MoO<sub>2</sub>/CNTs Catalyst: Insight into the Promoting Effect of Cobalt**

Ranran Ding<sup>a</sup>, Yulong Wu<sup>a,b\*</sup>, Yu Chen<sup>a</sup>, Hao Chen<sup>c</sup>, Jianlong Wang<sup>a</sup>, Yanchun Shi<sup>a</sup>, Mingde Yang<sup>a</sup>

<sup>a</sup>Institute of Nuclear and New Energy Technology, Tsinghua University, Beijing 100084, PR China

<sup>b</sup>Beijing Engineering Research Center for Biofuels, Beijing 100084, PR China

<sup>c</sup>School of chemical engineering and technology, Xi'an Jiaotong University, Xi'an 710049, PR China

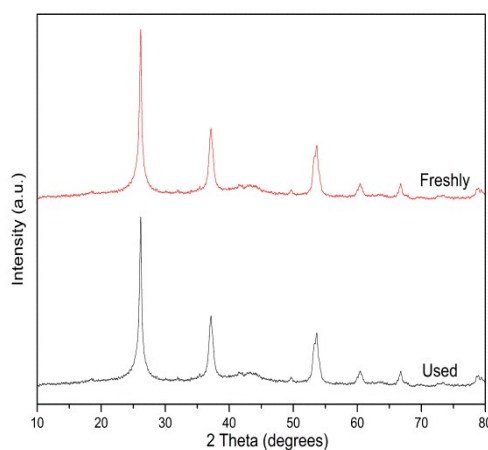

Figure S1. XRD patterns of freshly prepared and used ten times CoMo-500 catalyst.

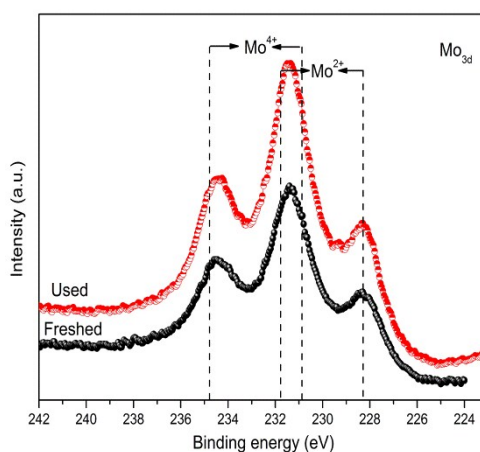

Figure S2. Mo3d XPS of freshly prepared and used ten times CoMo-500 catalyst.

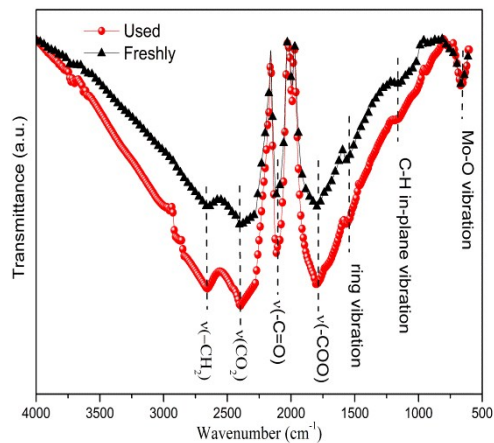

Figure S3. FT-IR patterns of freshly prepared and used ten times CoMo-500 catalyst.

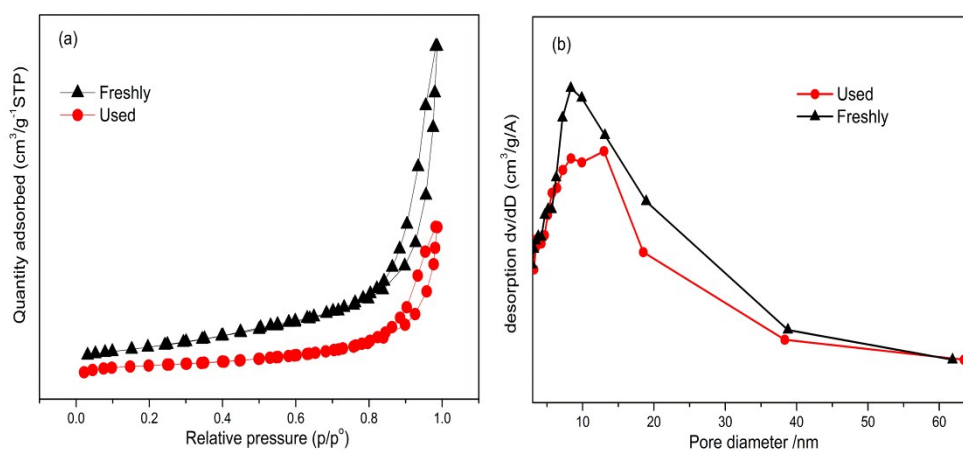

Figure S4. (a)  $N_2$  sorption-desorption isotherms and (b) pore size distributions of freshly prepared and used ten times CoMo-500 catalyst.
